# Supplementary material for: Effective Removal of Tetracycline from Water Using Copper Alginate @ Graphene Oxide with In-Situ Grown MOF-525 Composite: Synthesis, Characterization and Adsorption Mechanisms
Source: MDPI journal article supplement (doi:10.3390/nano12172897), 2022-08-23
Supplement: s1 [file s1]

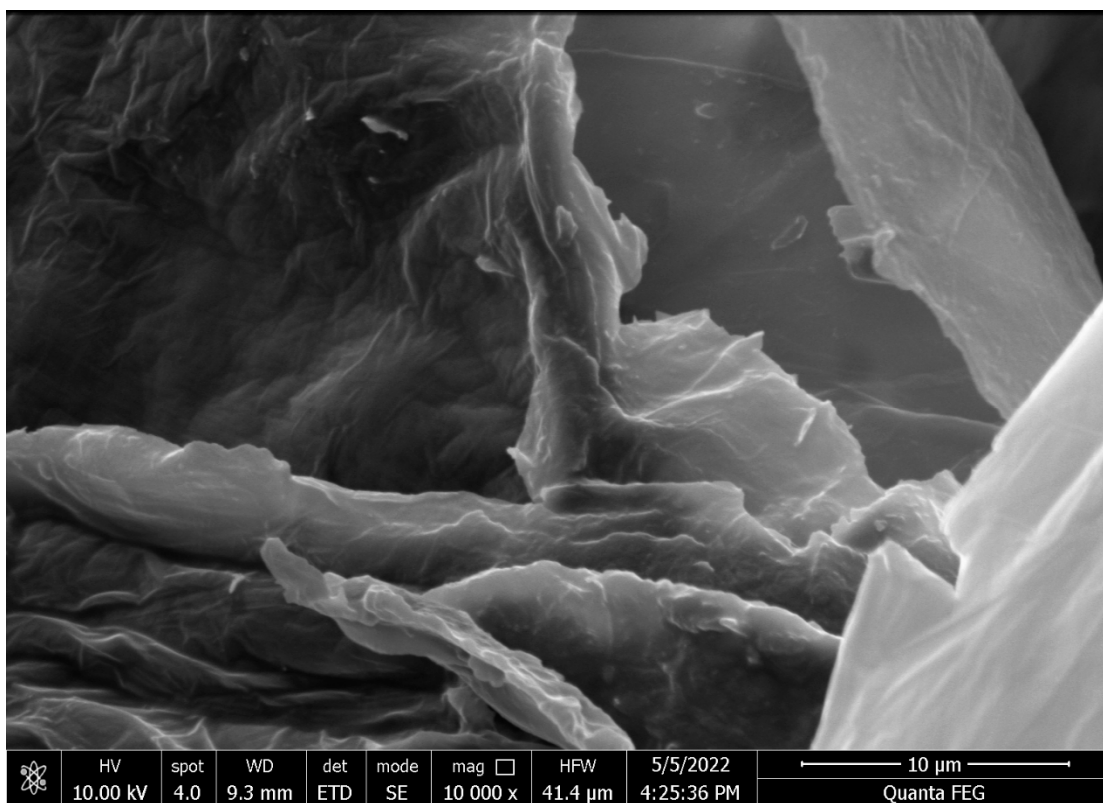

**Figure S1.** SEM micromorphology of GO

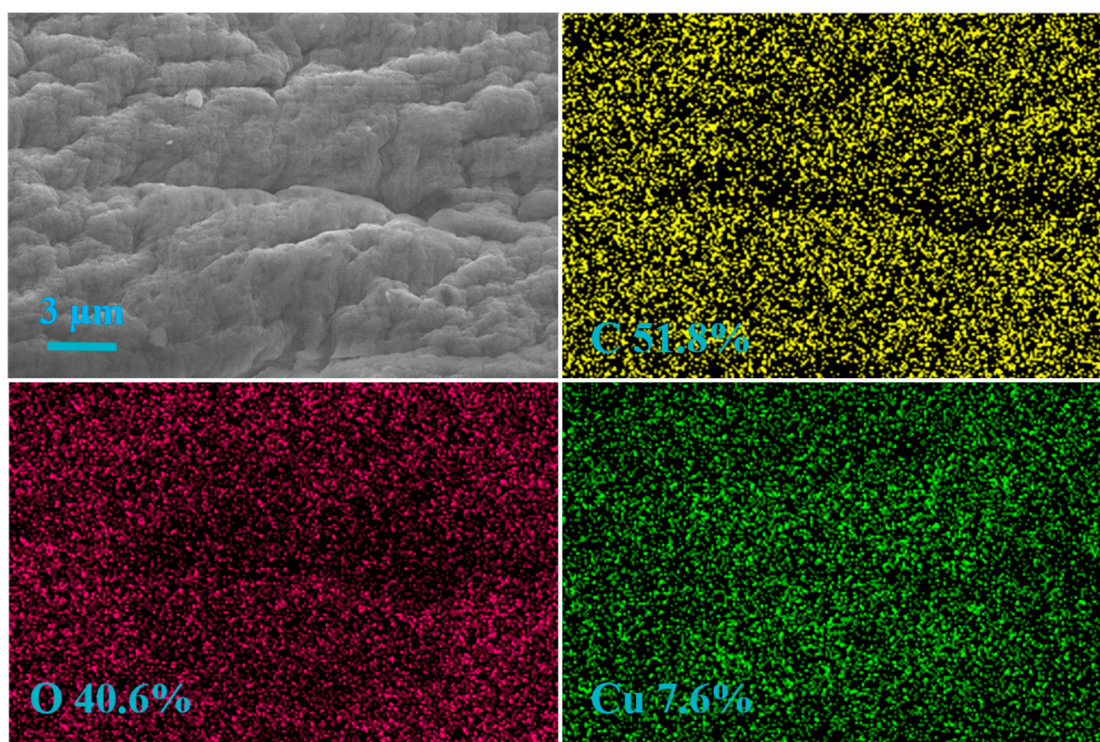

**Figure S2.** SEM images of Alg-Cu and the elemental distributions of C, O and Cu.

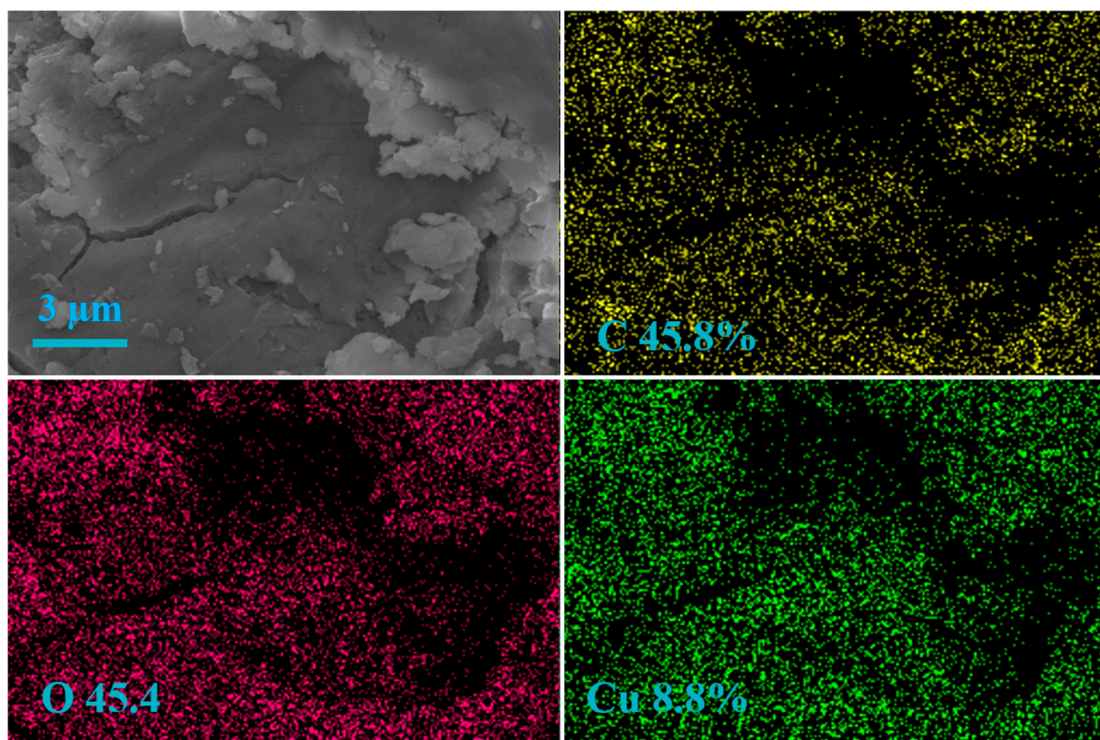

**Figure S3.** SEM images of Alg-Cu@GO and the elemental distributions of C, O and Cu.

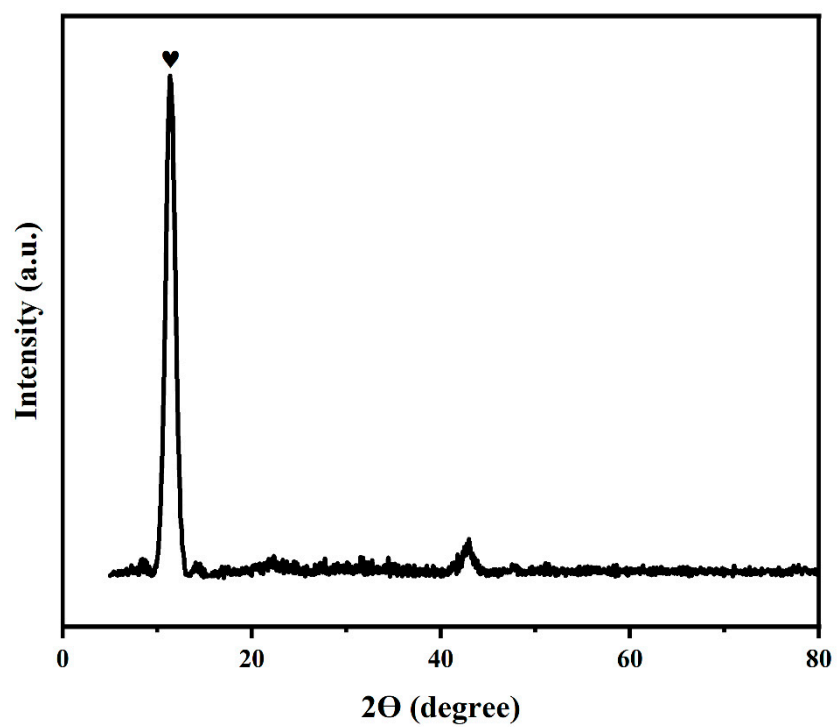

**Figure S4.** XRD patterns of GO.

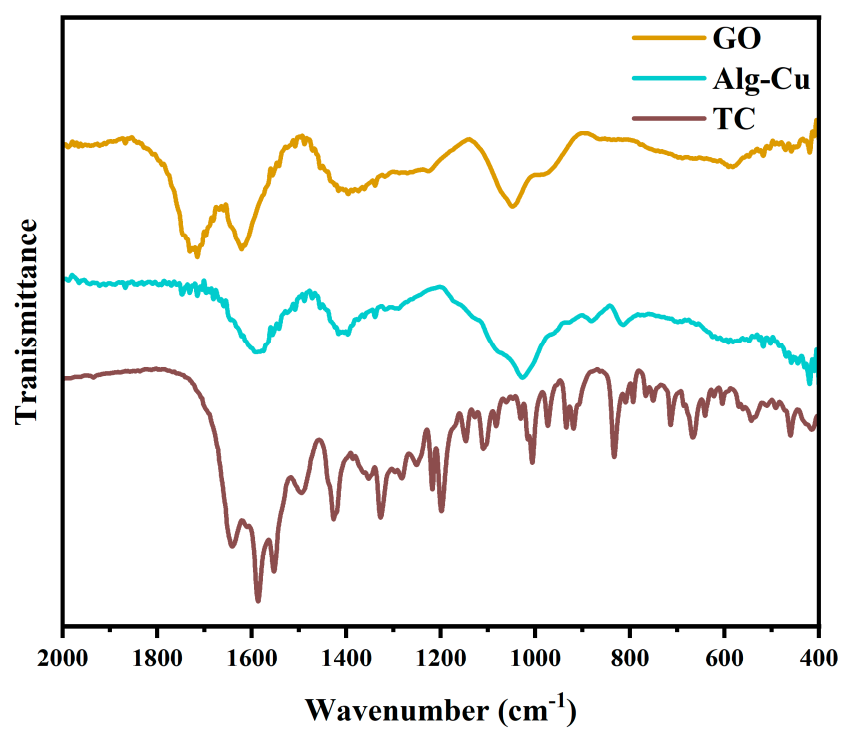

**Figure S5.** FTIR spectra of GO, Alg-Cu and TC.

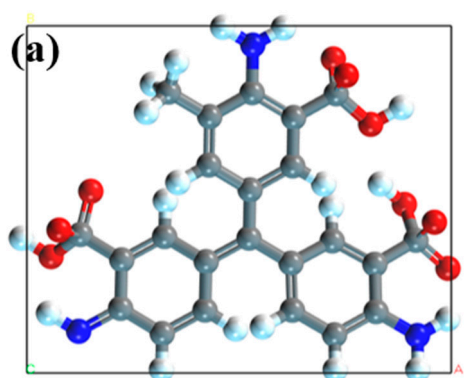

**Acid fuchsin**  $13.8 \text{ \AA} \times 11.0 \text{ \AA}$

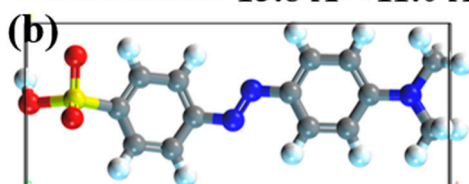

**Methyl orange**  $15.6 \text{ \AA} \times 6.0 \text{ \AA}$

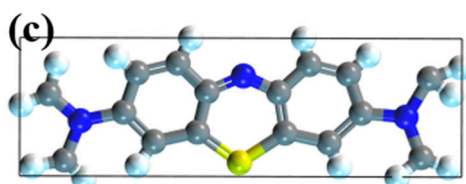

**Methylene blue**  $14.6 \text{ \AA} \times 5.8 \text{ \AA}$

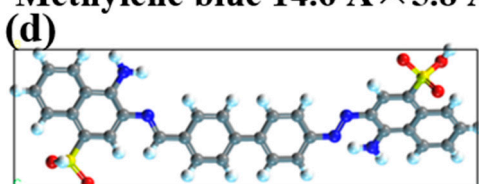

**Congo red**  $28.1 \text{ \AA} \times 7.6 \text{ \AA}$

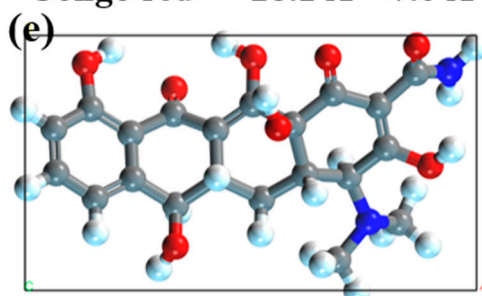

**Tetracycline**  $15.0 \text{ \AA} \times 8.0 \text{ \AA}$

**Figure S6.** Molecular size of different pollutants optimized by Martials studio.
